# Supplementary material for: Haploid selection drives new gene male germline expression
Source: HighWire-hosted journal article supplement (doi:10.1101/gr.238824.118), 2019-06-20
Supplement: Supplemental_Table_S1.pdf [file Supplemental_Table_S1.pdf]

**Supplemental Table S1.** Positive selection on new and old genes (*D. melanogaster*)

| Positive Darwinian selection <sup>a</sup> | New genes (%) | Old genes (%) |
|-------------------------------------------|---------------|---------------|
| Detected                                  | 14 (4.9)      | 203 (2.8)     |
| Non-detected                              | 274           | 7151          |

<sup>a</sup> Based on flyDIVaS database (Stanley and Kulathinal 2016); Fisher's exact test,  $p < 0.05$ .
